# Supplementary material for: Functional and Structural Analysis of Predicted Proteins Obtained from Homo sapiens’ Minisatellite 33.15‐Tagged Transcript pAKT‐45 Variants
Source: Hindawi journal article supplement (doi:10.1155/2020/2562950), 2020-01-01
Supplement: f1 [file 2562950.f1.pdf]

Unconserved 0 1 2 3 4 5 6 7 8 9 10 Conserved

```

      . . . . . 10 . . . . . 20 . . . . . 30 . . . . . 40 . . . . . 50
KF274549
gi_18676786_dbj MARRHCFSYW LLVCWLVVTV AEGQEEVFTL PGDSQNNADA TDCQIFFTLTP TS
gi_332801027_re MARRHCFSYW LLVCWLVVTV AEGQEEVFTP PGDSQNNADA TDCQIFFTLTP
gi_410038312_re MARRHCFSYW LLVCWLVVTV AEGQEEVFTP PGDSQNNADA TDCQIFFTLTP
gi_820999601_re MARRHRCFSYW LLVCWLVVTV AEGQEEVFTP PGDSQNNADA TDCQIFFTLTP
gi_795341321_re MARRHCFSYW LLVCWLVVTV AEGQEEVFTP PGDSQNNANP TDCRIFFTLTP
gi_724892822_re MARRHCFSYS LLVCWLVVTV AEGQEEIFTF PGDSQNNANP TDCQIFFTLTP
gi_795495563_re MARRHCFSYW LLVCWLAIVTV AEGQEEVFTP PGDSQNNANP TDCQIFFTLTP
gi_544432713_re MARRHCFSYW LLVCWLAIVTV AEGQEEVFTP PGDSQNNANP TDCQIFFTLTP
gi_795292143_re MARRHCFSYW LLVCWLAIVTV AEGQEEVFTP PGDSQNNANP TDCQIFFTLTP
gi_635043056_re MARRHCFSYW LLVCWLAIVTV AEGQEEVFTP PGDSQNNANP TDCQIFFTLTP
gi_795623660_re MARRHCFSYW LLVCWLAIVTV AEGQEEVFTP PGDSQNNANP TDCQIFFTLTP
gi_725577899_re MARRHCFSYW LLVCWLVVTV AEGQEEVFTP RGDSENNADH TDCQVFTLTP
gi_817355519_re MARRHCFSYW LLVCWLVVTV AEGQEEVFTP PGDSENNADH TDCQIFFTLTP
gi_560951620_re MAHRLSYSYC LLVCWLVVTV AEGQEGVVTG PGDSQHNADP TDCQIFFTLTP
gi_743746088_re MAHRLSYSYC LLVCWLVVTV AEGQEGVVTG PGDSQHNADP TDCQIFFTLTP
gi_584068511_re MAHRLCLSCWC LLVCWLVVMV AEGQ--VVTP PGGSQTEG-P TDCQIFFTLTP
Consistency 8868667876 88888888 8888768687 7888878855 88888888*9

```

```

      . . . . . 60 . . . . . 70 . . . . . 80 . . . . . 90 . . . . . 100
KF274549
gi_18676786_dbj FFPAPRSPVTR AQPITKTKPRC FFHFFFPR-- --RPRIHFRF FNRFFVPSRC
gi_332801027_re FFPAPRSPVTR AQPITKTKPRC FFHFFFPR-- --RPRIHFRF FNRFFVPSRC
gi_410038312_re FFPAPRSPVTR AQPITKTKPRC FFHFFFPR-- --RPRIHFRF FNRFFVPSRC
gi_820999601_re FFPARHSPVTR FQPITKTKPRC FFHFFFPR-- --RPRIHFRF FNRFFVPSRC
gi_795341321_re FFPATRSPVTR VQPITKTKPRC FFHFFFPR-- --RPRIHFRF FNRFFVPSRC
gi_724892822_re FFPTRHSPVTR VQPITKTKPRC FFHFFFPR-- --RPRIHFRF FNRFFVPSRC
gi_795495563_re FFPATRSPVTR GQPITKTKPRC FFHFFFPR-- --RPRHYFRF FNRFFVPSRC
gi_544432713_re FFPATRSPVTR VQPITKTKPRC FFHFFFPR-- --RPRHYFRF FNRFFVPSRC
gi_795292143_re FFPATRSPVTR VQPITKTKPRC FFHFFFPR-- --RPRHYFRF FNRFFVPSRC
gi_635043056_re FFPATRSPVTR VQPITKTKPRC FFHFFFPR-- --RPRHYFRF FNRFFVPSRC
gi_795623660_re FFPATRSPVTR VQPITKTKPRC FFHFFFPR-- --RPRHYFRF FNRFFVPSRC
gi_725577899_re FFPVTRSPVTR AQPVTKTKPRC FFLFFFPR-- --RPRVPRVHFRF FNRFFVPSRC
gi_817355519_re FFPITRSPVTR AQPITKTPPRC FFLFFFPR-- --RPRVPRVHFRF FNRFFVPSRC
gi_560951620_re FFPTRKSPVTR IQPITRTPRC FLHFFFPR-- --CPRVHLRF FYRFFHPPPTC
gi_743746088_re FFPTRKSPVTR IQPITRTPRC FLHFFFPR-- --CPRVHLRF FYRFFHPPPTC
gi_584068511_re FFPATRSPVTR IQPITRTPRC FFHFFFPR-- --RPRVQIRF FNRFFVPSRC
Consistency *76*8**9*6**9*89*9* *88**0*0007**9789* *8*9*7*78*

```

```

      . . . . . 110 . . . . . 120 . . . . . 130 . . . . . 140 . . . . . 150
KF274549
gi_18676786_dbj NHRFFFPQPFY WPHRYLTL--Y RYFPRRRLQR GSSSEES EGR ET--QYYSKK
gi_332801027_re NHRFFFPQPFY WPHRYLTL--Y RYFPRRRLQR GSSSEES ---
gi_410038312_re NHRFFFPQPFY WPHRYLTL--Y GYFPRRRLQR GSSSEES ---
gi_820999601_re NHRFFFPQPFY WPHRYLTL--Y RYFPRRRLQR GSSSEES ---
gi_795341321_re NHRFFFPQPFY WPHRYLTL--Y RYFPRRRLQR GSSSEES ---
gi_724892822_re NHRFFLPQRFY WPHRYLTL--Y RYFPRRRLQR GSSSEES ---
gi_795495563_re NHRFFFPQPFY WPHRYLTL--Y RYFPRRRLQR GSSSEES ---
gi_544432713_re NHRFFFPQPFY WPHRYLTL--Y RYFPRRRLQR GSSSEES ---
gi_795292143_re NHRFFFPQPFY WPHRYLTL--Y RYFPRRRLQR GSSSEES ---
gi_635043056_re NHRFFFPQPFY WPHRYLTL--Y RYFPRRRLQR GSSSEES ---
gi_795623660_re NHRFFFPQPFY WPHRYLTL--Y RYFPRRRLQR GSSSEES ---
gi_725577899_re NHRFFFPQPFY WPHRYLTL--G RYFLRRLQR GSSSEEI---
gi_817355519_re NYRFFFPQPFY WPHRYLTL--G --RYFLRRLQR GSSSEEI---
gi_560951620_re NHRFFQIHPPF WPHRYLTL--Y RYFPRRRLWR GSSSEESRAK REAFDILKEK
gi_743746088_re NHRFFQIHPPF WPHRYLTL--Y RYFPRRRLWR GSSSEESRAK REAFDILKEK
gi_584068511_re NHRFFHYRPFY RPNRRLQR Y RYFPRRRLWR GSSSEESRQK REAFDILKEK
Consistency *89*7778*8 8*996*7408 79879*8*7* *****7000 000000000

```

```

      . . . . . 160 . . . . . 170 . . . . . 180 . . . . . 190 . . . . . 200
KF274549
gi_18676786_dbj KPIIG-KKAT KRF--LRYL-- --SKLKI-- --LDLKKYK KKH-LGRWR
gi_332801027_re
gi_410038312_re
gi_820999601_re
gi_795341321_re
gi_724892822_re
gi_795495563_re
gi_544432713_re
gi_795292143_re
gi_635043056_re

```

```

gi_795623660_re-----
gi_725577899_re-----
gi_817355519_re-----
gi_560951620_reKFMWGRWGII RKGPTLGKLE DGSVLYLNLP PSLDLS SRRL AHIFLFTSCS
gi_743746088_reKFMW----- RR----- VKL----- SGRH AQHA-----
gi_584068511_reRSIF----- P KRL-----
Consistency 0000000000 0000000000 0000000000 0000000000 0000000000 0000000000 0000000000

```

```

- -
KF274549 C-
gi_18676786_dbj--
gi_332801027_re--
gi_410038312_re--
gi_820999601_re--
gi_795341321_re--
gi_724892822_re--
gi_795495563_re--
gi_544432713_re--
gi_795292143_re--
gi_635043056_re--
gi_795623660_re--
gi_725577899_re--
gi_817355519_re--
gi_560951620_reAL
gi_743746088_re--
gi_584068511_re--
Consistency 00

```

Figure S1



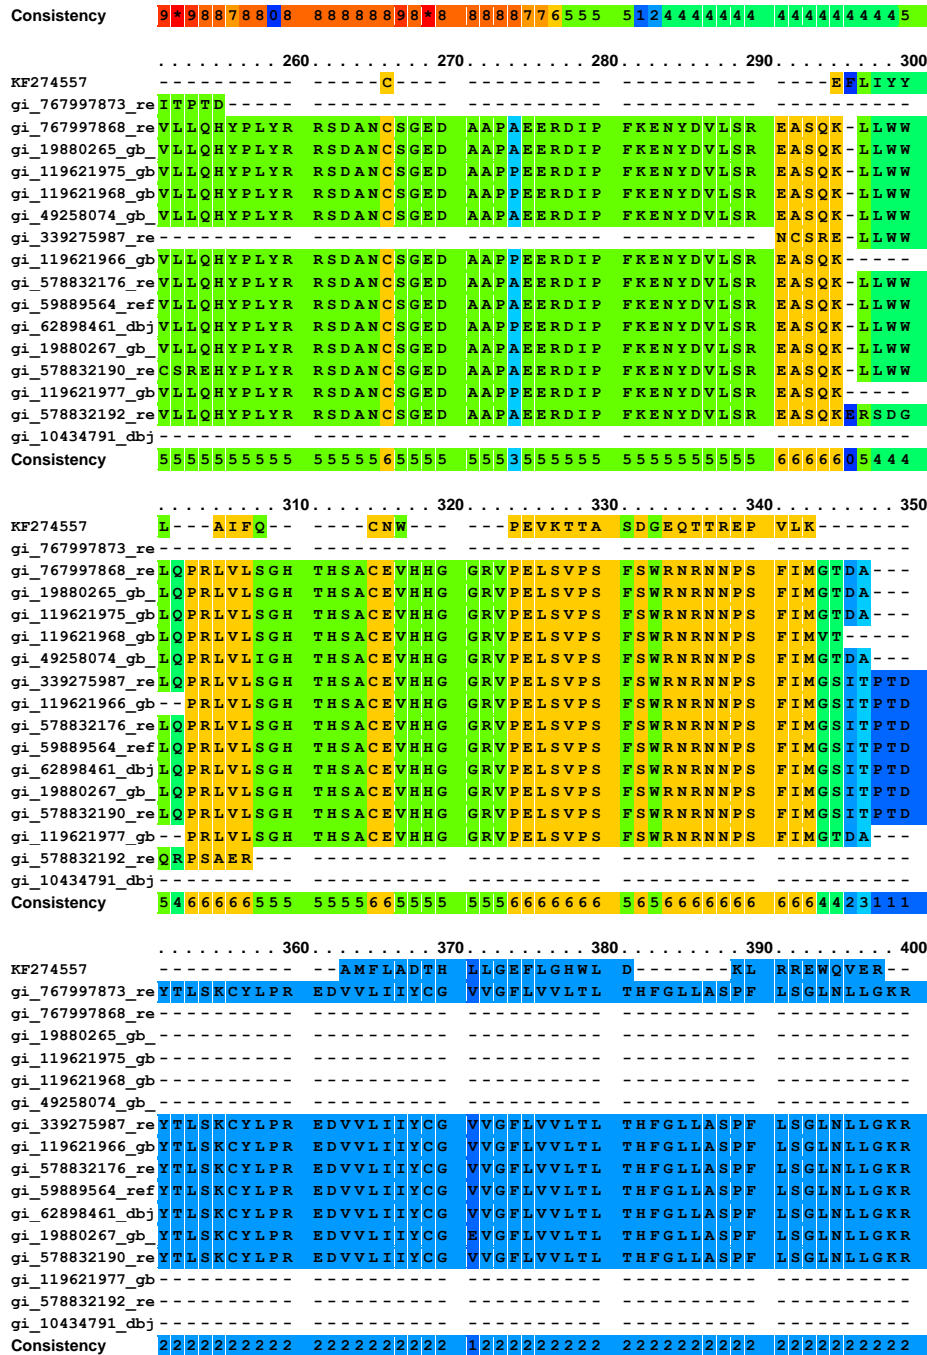

Figure S2
